# 1 VISIBLE IMPLANT ELASTOMER (VIE) SUCCESS IN EARLY 2 LARVAL STAGES OF A TROPICAL AMPHIBIAN SPECIES

3

4 Chloe Fouilloux\*<sup>1</sup>, Guillermo Garcia-Costoya<sup>1</sup>, and Bibiana Rojas<sup>1</sup>

5 <sup>1</sup>Department of Biology and Environmental Science, University of Jyväskylä, Finland

6 Corresponding Author:

7 Chloe Fouilloux\*<sup>1</sup>

8 Email address: [chloe.a.fouilloux@jyu.fi](mailto:chloe.a.fouilloux@jyu.fi)

9

## 10 Abstract

11

12 Animals are often difficult to distinguish at an individual level, but being able to identify  
13 individuals can be crucial in ecological or behavioral studies. In response to this challenge,  
14 biologists have developed a range of marking (tattoos, brands, toe-clips) and tagging (PIT,  
15 VIA, VIE) methods to identify individuals and cohorts. Animals with complex life cycles are  
16 notoriously hard to mark because of the distortion or loss of the tag across metamorphosis. In  
17 frogs, few studies have attempted larval tagging and none have been conducted on a tropical  
18 species. Here, we present the first successful account of VIE tagging in early larval stages  
19 (Gosner stage 25) of the dyeing poison frog (*Dendrobates tinctorius*) coupled with a novel  
20 anaesthetic (2-PHE) application for tadpoles that does not require buffering. Mean weight of  
21 individuals at time of tagging was 0.12g, which is the smallest and developmentally youngest  
22 anuran larvae tagged to date. We report 81% tag detection over the first month of  
23 development, as well as the persistence of tags across metamorphosis in this species.  
24 Cumulative tag retention versus tag observation differed by approximately 15% across larval  
25 development demonstrating that “lost” tags can be found later in development. Tagging had  
26 no effect on tadpole growth rate or survival. Successful application of VIE tags on *D.*  
27 *tinctorius* tadpoles introduces a new method that can be applied to better understand early life  
28 development and dispersal in various tropical species.

29

30

31

32

## 33 Introduction

34

35 Distinguishing individuals within a population is often key in deciphering animal behavior.  
36 Animal identification has applications in understanding parental care (Ménard et al., 2001),  
37 migration dynamics (Matthews et al., 2011) and social hierarchies (Holekamp et al., 1997).  
38 Studies across the animal kingdom have developed methods that vary both in invasiveness  
39 and success (guppies: Croft et al., 2003; dolphins: Defan et al., 1990; bears: Diefenbach &  
40 Alt, 1998; salamanders: Osbourn et al., 2011) to allow researchers to differentiate between  
41 individuals within groups. If visual differentiation is not an obvious option, physical  
42 manipulation (e.g. toe clips, tattoos; Perret & Joly, 2002; Phillott et al., 2007) and tagging  
43 (i.e. passive integrated transponder (PIT), visible implant alphanumeric (VIA), visible  
44 implant elastomer (VIE); Phillott et al., 2007; Donnelly et al., 1994) have been the most  
45 commonly used methods implemented in mark-recapture studies.

46

47 Differentiating individuals is important when there is a lot of intrapopulation variation in  
48 behavior, and is becoming especially relevant as we begin to see individuals adapt to new  
49 challenges onset by the effects of global warming, habitat fragmentation, and human  
50 interactions. However, long-term marker-based studies have not often been applied to  
51 animals with complex life cycles, as the physical transformations induced with  
52 metamorphosis and growth generally entail the loss or distortion of the mark. In anurans,  
53 there have been a range of successful tagging methods both in adult and larval stages, but the  
54 diversity of larval tagging studies has been limited to common temperate species (e.g.,  
55 Campbell Grant, 2008; Courtois et al., 2013), and very few studies have been able to create a  
56 methodology that spans the animal's entire life cycle (Bailey, 2004; Bainbridge et al., 2015;  
57 Caballero-Gini et al., 2019; Campbell Grant, 2008; McHarry et al., 2018). The current  
58 reported success rate of tags could be inaccurate for species outside of temperate regions.  
59 Tadpoles, especially those from neotropical regions, are known to be tremendously plastic  
60 with respect to morphology (Touchon & Warkentin, 2008), time-to-metamorphosis (Rudolf  
61 & Rödel, 2007), and even pigmentation (McIntyre et al., 2004), all of which could affect tag  
62 success.

63

64 Understanding the dispersion dynamics and survival of anurans from aquatic to terrestrial  
65 habitats makes developmentally early larval tagging especially interesting. For example,  
66 many species of poison frogs have parental care where recently hatched tadpoles are

67 transported from terrestrial sites to arboreal pools (Pašukonis et al., 2019; Ringler et al.,  
68 2013; Schulte & Mayer, 2017; Summers & Tumulty, 2013). Tadpole tagging could provide a  
69 quick and reliable method of following individuals across development, understanding  
70 relatedness within pools, and observing tadpole behavior and parental care in the field. Here,  
71 we use a novel anesthetic procedure for tadpoles followed by a VIE tag application on dyeing  
72 poison frog (*Dendrobates tinctorius*) larvae that is then monitored throughout development.

73

74 Larval anuran tagging has been limited with respect to both developmental stage and weight.  
75 Most of the larval tagging to date has been done beyond the point of the onset of hind leg  
76 development (Andis, 2018(Gosner stage 30); Bainbridge et al., 2015 (Gosner stage 36-38)).  
77 At this point *D. tinctorius* tadpoles are typically at least a month old, meaning they have  
78 already been transported by their fathers and have long since been subject to both predation  
79 risk and aggression by conspecifics (CF personal observation; Rojas, 2014, 2015; Rojas &  
80 Pašukonis, 2019). Therefore, in order to obtain more valuable life history information, tags  
81 need to be applied earlier in development.

82

83 To our knowledge, the developmentally earliest tagging study applied VIA/VIE tags around  
84 Gosner stage 25 (Courtois et al., 2013; Gosner 1960), but its application was limited to large  
85 temperate tadpoles (average weight around 1.5g) that could be manipulated in the field  
86 without anesthesia. In this study we use 2-phenoxyethanol, an anesthetic that does not need to  
87 be buffered and can be stored at room temperature (Acme-Hardestry, 2013; National Center  
88 for Biotechnology, 2020), making it field appropriate, and applied VIE tags to the smallest  
89 and developmentally earliest stages of larval anurans recorded to date. We follow growth rate  
90 and tag success across development, and discuss potential field applications in order to better  
91 understand the dispersion dynamics and behavior of protected frogs.

92

## 93 **Materials & Methods**

94

95 *Study organism* – We used tadpoles from a breeding laboratory population of *Dendrobates*  
96 *tinctorius* kept at the University of Jyväskylä, Finland. Adult pairs are each housed in a 55L  
97 terrarium that contains layered gravel, leaf-litter, moss substrate and is equipped with a  
98 shelter, ramps, and live plants. Terraria are maintained at 26C ( $\pm 2C$ ) and are automatically  
99 misted with reverse osmosis water four times a day, maintaining a humidity around 95% and  
100 lit with a 12:12 photoperiod. Frogs are fed live *Drosophila* fruit flies coated in vitamin

101 supplements three times per week. Tadpoles are raised singly in 10 x 6.5 x 5 cm cups which  
102 are filled with spring water, and fed *ad libitum* a diet of fish food (JBL NovoVert flakes)  
103 three times a week. Adult and tadpole health and water levels are checked daily, and  
104 experimental tadpoles were weighed and photographed weekly.

105

106 *Anesthesia*—Prior to tagging, tadpoles were anesthetized in a 14mL solution of a 1 $\mu$ L:1mL  
107 ratio of 2-phenoxyethanol (2-PHE) to spring water. 2-phenoxyethanol is an oily liquid at  
108 room temperature and does not need to be buffered for anesthetic purposes (Coyle et al.,  
109 2004). The solution was reused multiple times for multiple tadpoles within a single day of  
110 tagging; its effect did not deteriorate after multiple uses. Each day of tagging a new solution  
111 was made. Tadpoles were placed in anesthetic solution until there was no muscular  
112 contraction in response to agitation. This took approximately 3 minutes. The effect of  
113 anesthesia on tadpoles lasted approximately 6 minutes; within 10 minutes individuals had  
114 regained full muscular function. The effects of anesthesia were similar across developmental  
115 stages. We had no deaths in response to our anesthesia procedure, which was applied to a  
116 total of 40 individuals across both our pilot study and experimental manipulations;  
117 anesthetized tadpoles ranged across early larval developmental stages (Gosner 24-26).

118

119 *Tadpole tagging*—We applied VIE tags to early larval stages of *D. tinctorius* and monitored  
120 tadpoles across development (Fig 2) to ensure the presence of the tags over time, and to test  
121 the effects of larval tagging and tag retention across metamorphosis. Previous studies  
122 reporting tadpole tagging have been done primarily with late-term tadpoles (Gosner stage  
123 30+) whose snout-vent lengths (SVL) were double or triple the SVL of tadpoles in our  
124 experiment (Andis, 2018; Bainbridge et al., 2015; McHarry et al., 2018). Other studies also  
125 worked with amphibians who produce large egg clutches (*Litoria aurea*, 37000 eggs/clutch  
126 (Pyke & White, 2001); American bullfrog, 12000 eggs/clutch (Howard, 1978); *Alytes*  
127 *obstetricans*, 50 eggs/clutch (Reading & Clarke, 1988)), which allowed for large tag sample  
128 sizes (n = 53-90, depending on study). *Dendrobates tinctorius* lay clutches that range from 2  
129 to 5 eggs with a high level of mortality (Rojas & Pašukonis, 2019). Due to the reproductive  
130 limitations of the system, our sample total (n = 27 tagged, n = 11 control) is less than  
131 previously published data.

132

133 Elastomer was mixed and loaded into syringes prior to each tagging session, according to the  
134 Northwest Marine Technology VIE tag protocol. Elastomer was stored in a freezer (-20C)

135 during extended periods of disuse and in a refrigerator between individual tagging sessions;  
136 we found that mixed elastomer was no longer effective after a storage period of longer than  
137 three months. Average tagging procedure was executed in under 90 seconds. Throughout our  
138 pilot study we found that tag retention was most effective when placed dorsally; thus, this  
139 experiment only contained dorsally marked tadpoles. Each tadpole was marked only once.

140

141 Tadpoles were placed on a laminated surface and dried with a paper towel to improve grip; a  
142 needle was placed subcutaneously and dye (approx. 1  $\mu$ l) was injected. For this experiment,  
143 we used a fluorescent green elastomer, though any color tag would have been suitable for  
144 application. Tadpoles were placed under UV light to ensure proper placement of the tag.  
145 Tadpoles post-anesthesia were placed in a pool of spring water and observed for 10 minutes  
146 to ensure proper return of muscular function. After the observation period, tadpoles were  
147 returned to the pool of water in which they were living.

148

149 *Statistical analysis*

150

151 *Tag retention and observation model*

152 VIE tag retention and observation was modeled using a Bayesian CJS (Cormack-Jolly-Seber)  
153 survival model (see R and JAGS code in supplementary materials; Jolly, 1965; Lebreton et  
154 al., 1992; Seber, 1965). For each individual, we considered tag observation as a categorical  
155 variable that was recorded as absent (0) or present (1); tags that had been lost and not re-  
156 observed were marked NA after the last confirmed observation. We assessed the status of the  
157 tag and tadpole development (size, weight) weekly. Tag retention was recorded as present (1)  
158 for all weeks previous to the last observation and recorded as NA for all those that  
159 followed. Our coding schematic (see Fig 1) takes into account observer error as a tag that is  
160 not observed at one time point but seen later in development is recorded as “retained”  
161 throughout the entire unobserved period. The retention status of the tag is unknown after the  
162 last positive observation. Our model considered weekly discrete time steps where the  
163 retention and observation of the tag were considered latent variables that occurred with a  
164 certain probability ( $\phi$  and  $p$ , respectively following the nomenclature commonly used for  
165 CJS models).

166

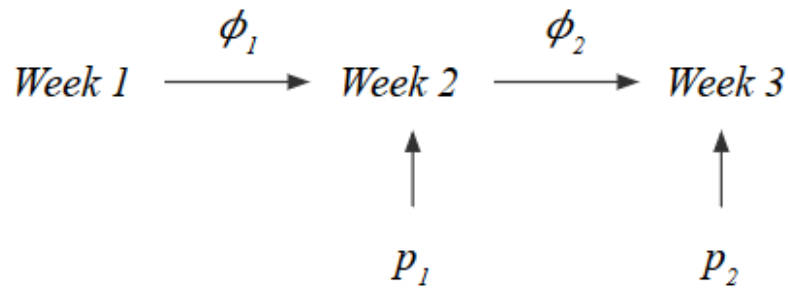

167

168 Figure 1. Schematic illustrating retention and observation variables in tag detection model.

169 Where  $\phi$  is the probability and  $p$  is the probability of observation. Consecutive weeks of an  
170 unobserved tag were marked “retained” if the tag was found later in development.

171 We considered three possible models (M1-3) of increasing complexity for  $\phi$  and  $p$ :  
172 M1 assumed constant probabilities of observation and retention, M2 considered a week effect  
173 on both probabilities using a logit link function, and M3 took into account both a week effect  
174 on  $\phi$  and  $p$  as well as individual identity as a random effect. Tag retention and observation  
175 were defined as following a binomial distribution with a probability  $\phi$  and  $p$  respectively for  
176 all models. In models M2 and M3 retention and observation varied for each week of  
177 development ( $t$ ), thus we used a logit link function to determine  $\phi$  and  $p$  for each week  
178 considered. In model M3 retention and observation were also influenced by individual identity  
179 ( $id$ ), to account for it, we sampled the random effect parameter estimates from a normal  
180 distribution with a certain standard deviation for each individual which were later incorporated  
181 to the same logit link function.

182

183 For each model we used an MCMC approach considering uninformative priors for all  
184 parameters (see supplementary materials) and simulation run characteristics of 4 chains,  
185 100,000 iterations with a 5,000 burn-in and a thinning of 10. Chain convergence was assessed  
186 using a potential scale reduction factor (PSRF) of our parameter estimates which discarded any  
187 model run that resulted in a PSRF larger than 1.1 or smaller than 0.9. We checked sample  
188 independence by determining the effective sample size of each parameter. We did not consider  
189 any model run with less than 5000 independent samples for any parameter.

190

191 Model selection was based on the lowest DIC value (Deviance Information Criterion) and  
192 biological relevance. The most likely discrete probabilities of retention and observation for

193 each week were based on the posterior distributions generated by our model, these values  
194 were used to visualize the cumulative probability of tag detection across larval development.

195  
196 *Tadpole growth rates*

197 Growth rates were compared between treatments using a linear mixed-effect model (LMM).  
198 Weekly weight (~weight) and treatment (~treatment) were coded as additive predictors in the  
199 growth rate model. Tadpole ID was used as a random effect on the intercept. Growth between  
200 treatments was compared by calculating weekly rate changes across development for both  
201 treatments, and then rate percent was used in model analysis which were evaluated with a  
202 Kenward-Roger's method ANOVA. Growth rate models were chosen as a result of Akaike  
203 Information Criterion output (AIC; Akaike, 1973).

204  
205 *Tadpole survival rates*

206 We used a Kaplan-Meier survival curve to visualize treatment effect on tadpole survival. A  
207 Cox proportional hazard model was used to calculate the parameters and uncertainty of  
208 tagging on survival. Survival object was parameterized with respect to death and time in  
209 response to treatment (Surv(Week, Dead) ~ Treatment). Survival was coded as a binomial  
210 response (alive (0), dead (1)).

211  
212 All models and statistics were performed in the program R using base R (v. 3.6.1, R  
213 Development Core Team, 2019) with additional packages "survival" (Therneau, 2014),  
214 "dplyr" (Wickham et al., 2019), "lme4" (Bates et al., 2015), "pbkrtest" (Halekoh &  
215 Højsgaard, 2014), "JAGS" (Plummer, 2003), and "R2jags" (Su & Yajima, 2015).

## 216 217 **Results**

218  
219 *Tag success* – Out of our 27 fluorescent tags, 81 % (22/27) were successfully detected in  
220 tadpoles over the first month of application. This decreased to a little over 50% (8/15)  
221 detection by the third month of application, which also marks the approximate time of  
222 tadpole metamorphosis. Mean weight at time of tagging was 0.12g ( $\pm$  0.019 SE) for tagged  
223 tadpoles and 0.099g ( $\pm$  0.015 SE) for control tadpoles. Control tadpole weights ranged from  
224 0.0307 to 0.18g at initial weigh-in, tagged tadpole weights ranged from 0.0318 to 0.36g at  
225 time of tagging. The smallest successful tag was applied at 0.0318g, which was a tadpole

226 who had recently hatched (approximately Gosner stage 25). Our experimental tadpoles were  
227 tagged in the early larval stages of development: the youngest successful tag was applied  
228 on recently hatched tadpoles who had yet to be transported by their fathers. We report here  
229 that tagging did not prevent transport behavior by father ( $n = 2$ ), though tagging at this life  
230 stage is especially delicate and requires a practiced hand. We attempted embryonic tagging in  
231 pilot studies, but were not able to successfully inject the tag without permanently damaging  
232 the embryo.

233

234 The model that had the lowest DIC did not include a week effect or an individual random  
235 effect (M1). It is important to note that tag observation sometimes changed throughout  
236 development, and tags that were not observed one week sometimes were detectable later in  
237 development (see Fig 3). Instances where tags were not observed could be due to individual  
238 growth, resulting in a tag being obstructed by a physical structure (i.e. muscle, tissue) for a  
239 period of time. For example, the cumulative probability of tag retention ( $\phi$ ) until the third  
240 month of development was 0.61 (0.33 -0.80, 95% CI) while the cumulative probability of tag  
241 observation ( $p$ ) was 0.38 (0.16-0.59, 95% CI). On average, the difference between  
242 cumulative retention and observation rates was about 15%.

243

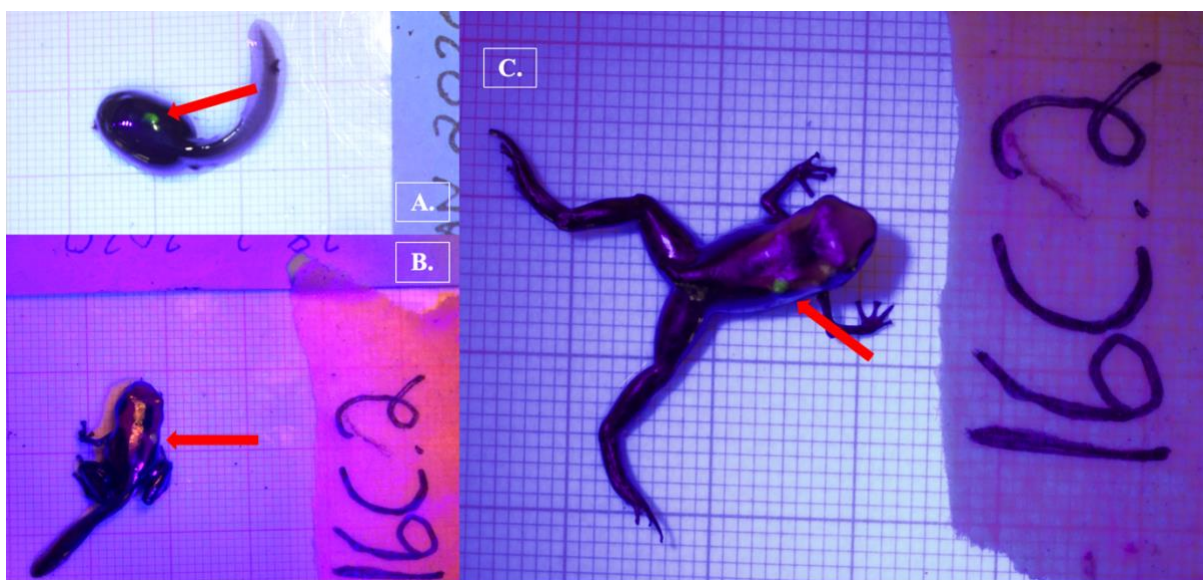

244

245 Figure 2. Fluorescent green VI Elastomer tag inserted dorsally on *Dendrobates tinctorius*  
246 shown on the same individual as (a) a late stage larva, (b) a metamorph, and (c) a recently  
247 metamorphosed juvenile. All photos taken with Nikon DS5300 DSLR on 1 x 1 mm  
248 background under UV light to enhance tag detection.



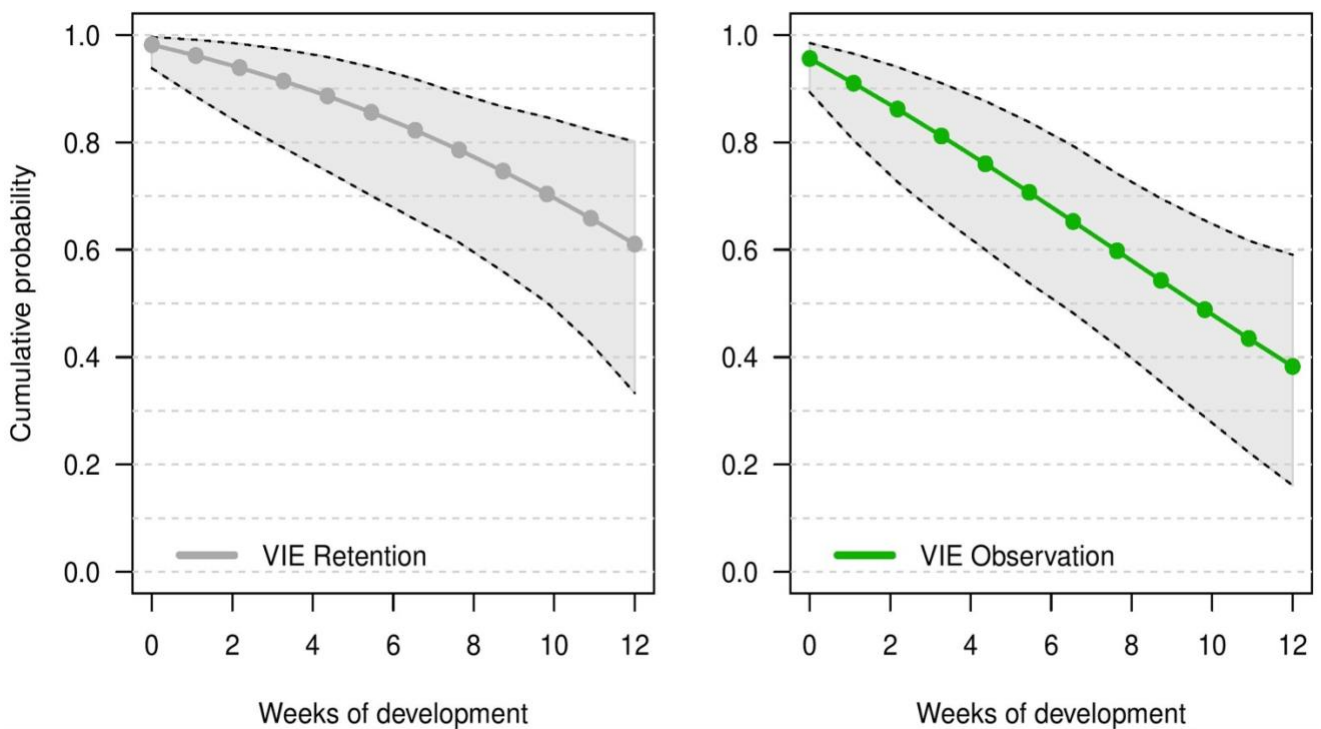

249

250 Figure 3. Estimate of the cumulative probability of tag detection across larval development  
251 for model M1. Points are posterior means. Grey points are the probability of tag retention ( $\phi$ )  
252 and green points are probability of tag observation ( $p$ ) at discrete time intervals  
253 corresponding to weeks of development. Grey polygons delimited by black dashed lines  
254 indicate the 95% credible intervals.

255

256 *Growth rate* – We found no significant difference in weekly growth rate between control and  
257 tagged tadpoles (Fig 4), indicating that tagging does not affect tadpole growth (lmer,  
258 ANOVA Kenward-Roger’s method,  $F(1, 37) = 1.12, p = 0.296$ ). Weekly tadpole growth rate  
259 significantly decreased across time (lmer, ANOVA Kenward-Roger’s method,  $F(1, 415) =$   
260  $56.4, p = 0.03563_{-11}$ ).

261

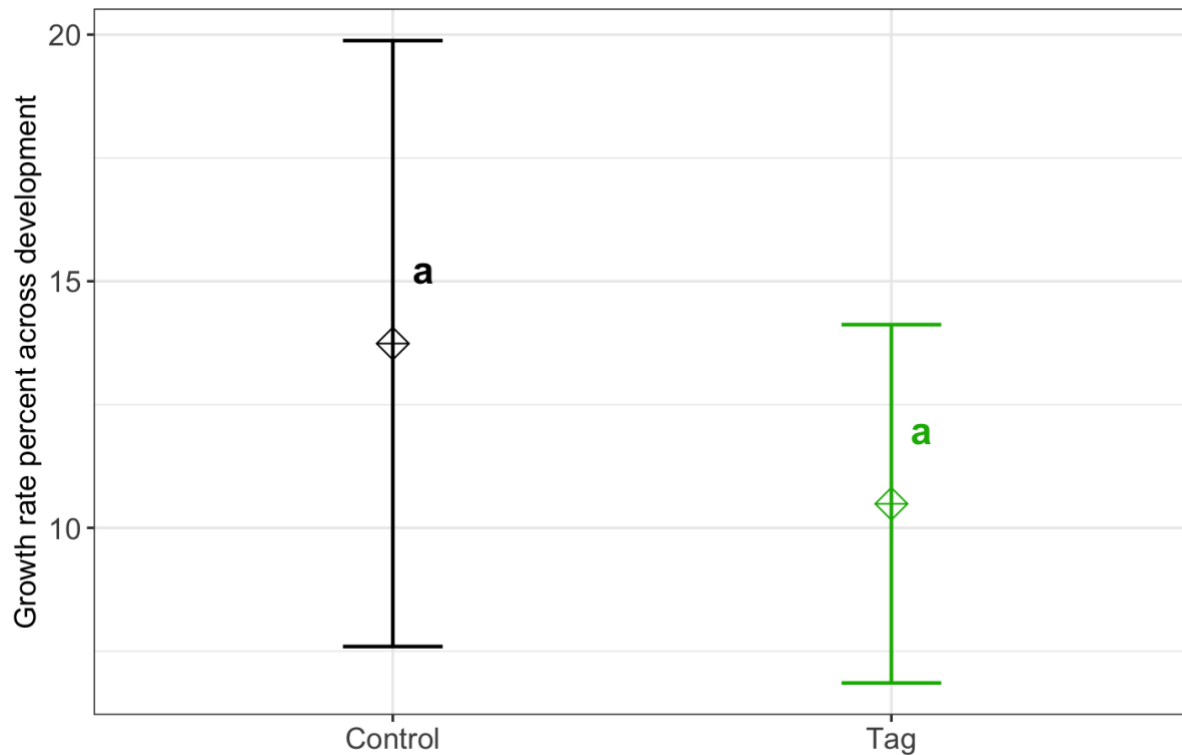

262

263 Figure 4. Average growth rate percent of VIE tagged and control groups. Diamonds represent  
264 the LS mean for which error bars indicate 95% confidence intervals. Means sharing letters  
265 are not significantly different (Tukey-adjusted comparisons, ANOVA Kenward-Roger's  
266 method,  $F(1, 37) = 1.12$ ,  $p = 0.296$ ).

267

268 *Survival*— There was no significant difference in survival between control and tagged groups  
269 across larval stages of development. Mortality across the first three months was 18% ( $n$   
270  $=5/27$ ) for tagged tadpoles and 27% ( $n = 3/11$ ) for control tadpoles (Fig 5). A Cox  
271 proportional hazard model did not find any significant difference in survival based on  
272 treatment (Cox proportional hazards model,  $z = -0.29$ ,  $p = 0.76$ ). Post-metamorphic survival  
273 was excluded from analysis due to unnaturally high froglet loss throughout the lab colony  
274 which is not indicative of tag impact on froglet survival, but likely ineffective laboratory  
275 practices for juvenile health.

276

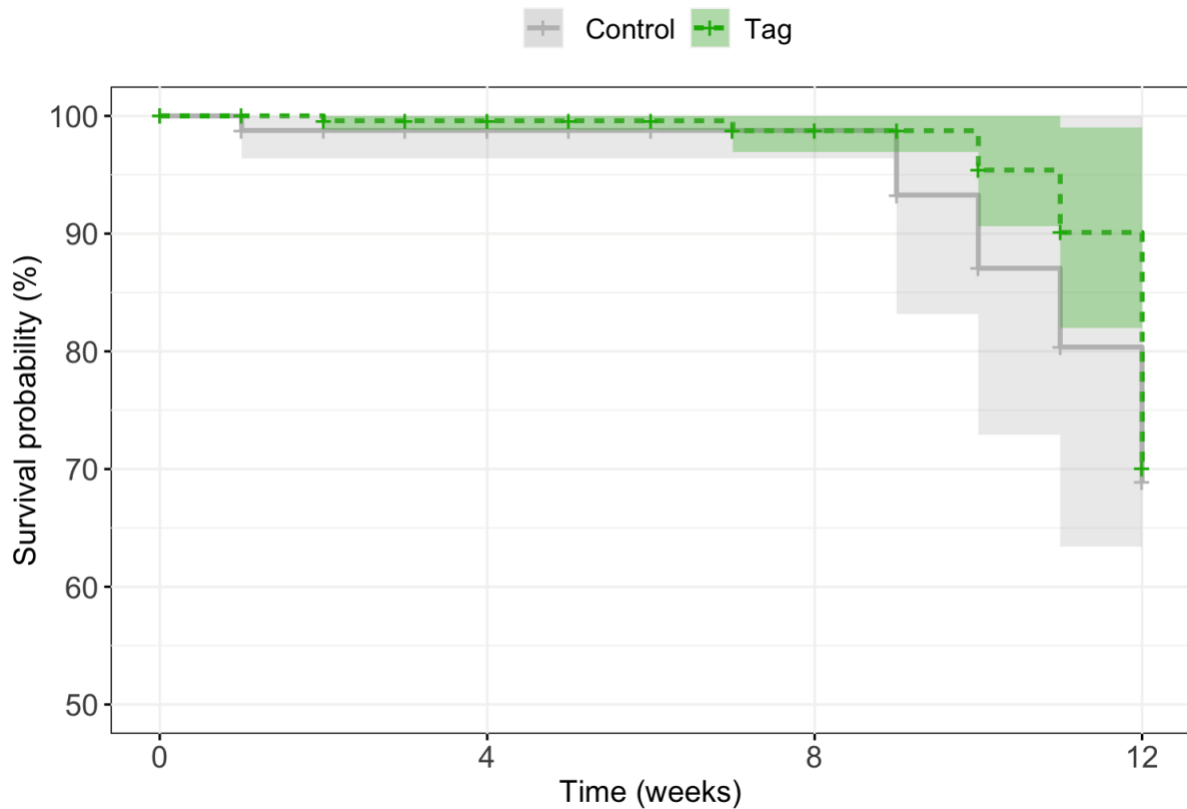

277  
278

279 Figure 5. Kaplan Meier survival analysis of experimental tadpoles across larval development.  
280 A Cox proportional hazards model did not find any significant difference in treatment on  
281 tadpole survival across development ( $z = -0.29$ ,  $p = 0.76$ ).

282

## 283 Discussion

284

285 In our study we applied VIE tags on *D. tinctorius* tadpoles and monitored them across  
286 development under laboratory conditions. Compared to previously published visible implant  
287 studies, our approach presents application at the youngest developmental stage, and is only  
288 the third study (after Bainbridge et al., 2015; Andis, 2018) to follow tags across  
289 metamorphosis. To our knowledge, this is the first attempt of larval tagging in a tropical frog,  
290 as previous work focused exclusively on species from temperate regions (Bainbridge et al.,  
291 2015: *Litoria aurea*; Courtois et al., 2013, *Alytes obstetricans*; Nauwelaerts et al., 2000, *Rana*  
292 *esculenta*). The successful application of VIE tags for the first time in a tropical species with  
293 elaborate parental care provides valuable opportunities to investigate parent-offspring  
294 interactions and dispersion of these species in a natural context.

295

296 Similar to other studies, we found no difference in growth rate or survival between tagged  
297 and control treatments. Based on our weekly weigh-ins and LMM model, we did not detect  
298 any significant impact of tagging on growth rates across development. Throughout our study,  
299 tadpoles grew significantly faster earlier in development which could be due to laboratory  
300 conditions (a high-food, no-competition environment). Given the circumstances, tadpoles  
301 may have invested energy in growing early in development which would help avoid  
302 predation and decrease latency to metamorphosis in the wild (Caldwell & De Araújo, 1998;  
303 Rojas, 2014). We found no effect of tagging on *D. tinctorius* survival across development;  
304 however, we had high rates of post-metamorphic mortality across our laboratory population.  
305 Natural history studies of *D. tinctorius* have shown high larval death rates (Rojas &  
306 Pašukonis, 2019). Although our tadpoles were not subject to the same pressures as wild  
307 populations, the mortality we observed across both treatments reflect the precariousness of  
308 early life stages in *D. tinctorius*.

309

310 After the first month of observation, 81% of tadpoles retained their tag, which is on par with  
311 retention rates reported in other tagging efforts (Anholt et al., 1998; Martin, 2011). Other  
312 studies report even higher rates of success with tadpoles elastomer tags (Courtois et al., 2013  
313 (100%), Bainbridge et al., 2015 (100%)) which could be due to a shorter larval period and  
314 larger individuals at time of application. Retention rates of this study are of note because VIE  
315 tags have been extensively used for mark-recapture studies in fishes and anurans; when  
316 taking into account our tag retention rate and our tagging procedure (which takes less than 90  
317 seconds), we can conclude that larval VIE mark-recapture studies on tropical amphibians is  
318 feasible.

319

320 A relevant note about implant tagging is that it is limited to observer perception. As tadpoles  
321 develop, morphological and phenotypic individual changes can facilitate or mask the  
322 presence of a tag. Most importantly, the lack of tag observation should not be assumed to  
323 indicate tag loss. In our experiment we were able to differentiate the cumulative probability  
324 of retention versus observation over time as a result of weekly checks of tag condition in  
325 experimental tadpoles. Over three months of development tags could go multiple weeks  
326 unobserved; finding them later in development indicated that tags were not lost, but had  
327 shifted position or been re-exposed as a result of growth. This is important to take into  
328 account for mark-recapture studies in settings where regular sampling or capture of the entire  
329 tagged population isn't feasible. Our model estimates an average 15% difference in tag

330 observation versus retention across larval development which is an error that can be  
331 incorporated as an informative prior in future tagging studies.

332

333 VIE tags come in a range of fluorescent colors, making the distinction of clutches or  
334 individuals from a distinct cohort possible. This is especially relevant for the larval stages of  
335 *D. tinctorius* when tadpoles are aggressive cannibals, as tagging efforts would help  
336 distinguish resident tadpoles in phytotelmata. Thus, tagging could be used to help monitor  
337 who is being deposited and who is getting attacked, allowing us to track interactions between  
338 tadpoles in ephemeral pools (Rojas, 2015). Moreover, VIE tagging of *D. tinctorius* makes it  
339 possible to successfully tag tadpoles before they are picked up and transported by their  
340 parent. Elastomer tags most clearly fluoresce under low-light conditions, making them ideal  
341 for their application in wild *D. tinctorius* tadpoles which live in dimly lit closed canopy  
342 rainforest.

343

344 VIE tags are one of the smallest tagging methods available for field studies. With respect to  
345 other tagging methods, VIA tags require a minimum SVL of 2 cm (Courtois et al., 2013) and  
346 PIT tags require 4 cm (Courtois et al., 2013), making VIE tags a unique option to study larval  
347 dynamics. VIE tags are not more than 4 mm in length, meaning that their successful  
348 application presents new opportunities to study larval amphibians that may not have been  
349 considered in the past. For example, *Anomaglossus beebei*, a small endemic poison frog from  
350 Guyana, has been seen to transport tadpoles multiple times throughout development (CF,  
351 personal observation). Larval tagging of this species could help decipher how shifting male  
352 territories influences larval care and transport, and if newly established males take care of  
353 tadpoles that are not their own. Early larval tagging could also work for *Allobates femoralis*,  
354 another tadpole transporter, to understand the shifting genetic diversity within phytotelmata  
355 across time (Erich et al., 2013).

356

357 Coupled with the unique patterning of *D. tinctorius* that emerges in late metamorphosis and  
358 settles in adulthood (Courtois et al., 2012; Rojas & Endler, 2013), tags can provide early life  
359 identification that could be followed by pattern recognition, enabling individual  
360 discrimination throughout an individual's entire lifespan. Bainbridge et al. (2015) report  
361 recently metamorphosed VIE tag retention to be high (88-95%); we also find that tags that  
362 lasted throughout larval development persisted across metamorphosis and into terrestrial life.  
363 Aside from implant tagging, genetic tracking has proven to be a reliable method to follow

364 amphibian larvae throughout development into adulthood. With this said, genetic tracking  
365 does not provide immediate individual detection; further, studies using this method have been  
366 limited to individuals in a closed population, making the recapture of (surviving) tracked  
367 individuals reasonably certain (Ringler et al., 2015). In *D. tinctorius*, however, males can  
368 travel remarkable distances while carrying tadpoles (Pašukonis et al., 2019) making genetic  
369 tracking a less suitable method for individual distinction in this species. Andis (2018) also did  
370 remarkable work dyeing tadpoles of *Rana sylvatica* with calcein. This dye appears to persist  
371 across metamorphosis, though it should be noted that their development is much shorter than  
372 *D. tinctorius* and staining only allows for presence/absence detection. The presence of a VIE  
373 tag (and the range of colors available for application) allows for immediate discrimination of  
374 multiple groups/cohorts which may be an important advantage when conducting behavioral  
375 experiments and elucidating natural history dynamics in the wild.

376

377 Our study presents a successful continuation expanding marking methodology to larval  
378 tropical species. Using laboratory conditions, we were able to mimic a common scenario  
379 where experimental tadpoles were left to develop in small, stable pools of water. This is  
380 reflective of the most common parental behavior exhibited by *D. tinctorius*, where males  
381 transport newly-hatched tadpoles to develop in small water holdings (Rojas & Pašukonis,  
382 2019). Future studies in field conditions would be useful to supplement these findings. For  
383 example, it will be important to understand how tadpole interaction with conspecifics,  
384 heterospecifics, and predators affects tag success. However, based on previously published  
385 data and the observation rates of our elastomers in this experiment, we believe that the  
386 application of elastomers in the wild is already an appropriate method to distinguish tadpoles  
387 for behavioral experiments. Elastomers are small, successful, and relatively easy to apply in  
388 early amphibian life stages. Our study contributes to the growing body of methods-based  
389 research demonstrating that visible implant elastomers are a viable tagging solution on a  
390 variety of anuran species in early development.

391

392 Ethics statement: This experiment was permitted by the National Animal Experiment Board  
393 (ESAVI/9114/04.10.07/2014). Raw data and R code will be available upon acceptance at the  
394 University of Jyväskylä data repository. DOI xxx.

395

396 **Conclusions**

397 Differentiating individuals/cohorts can be a powerful tool when conducting behavioral  
398 experiments. Often, marking animals is a technique used to distinguish individuals when  
399 physical features are not distinct enough for visual differentiation. Choosing an optimal tag  
400 for a system is a tradeoff between reliability and invasiveness and is often limited to product  
401 cost and efficiency in identification. Elastomers (VIE) are injectable polymers that have been  
402 extensively used in fish and anuran systems. However, until this point, they have been  
403 applied to large larvae or adults and have been heavily biased towards common, temperate  
404 species. Here, we present the first application of VIE tags on a small larval tropical frog  
405 (*Dendrobates tinctorius*) and follow tag success across development. We found that (1) VIE  
406 tags can be successfully applied to recently hatched tadpoles, (2) tags can be reliably  
407 followed throughout larval development and sometimes retained across metamorphosis, and  
408 (3) VIE tags do not appear to interfere with parental care behavior (i.e. tadpole transport).  
409 Our study expands the application of tagging to early developmental stages in tropical  
410 amphibians which can be of use in behavior, conservation, and natural history research  
411 studies in the future.

412

### 413 **Acknowledgements**

414 We would like to give an enormous thank you to Matthieu Bruneaux for his conversation and  
415 recommendation with respect to Bayesian modeling. We also owe a big *kiitos* to master's  
416 students Nina Kumpulainen and Emmi Alanen and lab technician Teemu Tuomaala for  
417 helping with tadpole care-- it takes a village.

418

### 419 **References**

- 420 Acme-Hardestry. (2013). Phenoxyethanol ; 2-phenoxyethanol. *Federal Register*, 77(58), 1–6.
- 421 Akaike, H. (1973). Maximum likelihood identification of Gaussian autoregressive moving  
422 average models. *Biometrika*, 60(2), 255–265.
- 423 Andis, A. Z. (2018). A new, noninvasive method of batch-marking amphibians across  
424 developmental stages. *Herpetological Conservation and Biology*, May.
- 425 Anholt, B. R., Negovetic, S., & Som, C. (1998). Methods for anaesthetizing and marking  
426 larval anurans. *Herpetological Review*, 29(3), 153–154.
- 427 Bailey, L. L. (2004). Evaluating Elastomer Marking and Photo Identification Methods for  
428 Terrestrial Salamanders: Marking Effects and Observer Bias. *Herpetological Review*,  
429 35(1), 38–41.

- 430 Bainbridge, L., Stockwell, M., Valdez, J., Klop-Toker, K., Clulow, S., Clulow, J., & Mahony,  
431 M. (2015). Tagging tadpoles: Retention rates and impacts of visible implant elastomer  
432 (VIE) tags from the larval to adult amphibian stages. *Herpetological Journal*, 25(3),  
433 133–140.
- 434 Bates, D., Mächler, M., Bolker, B. M., & Walker, S. C. (2015). Fitting linear mixed-effects  
435 models using lme4. *Journal of Statistical Software*, 67(1).  
436 <https://doi.org/10.18637/jss.v067.i01>
- 437 Caballero-Gini, A., Villafaña, D. B., Romero, L., Ferreira, M., Cañete, L., Laino, R., &  
438 Musalem, K. (2019). Visible implant alphanumeric (VIA) as a marking method in the  
439 lesser snouted treefrog *scinax nasicus*. *Acta Herpetologica*, 14(2), 129–133.  
440 [https://doi.org/10.13128/a\\_h-7751](https://doi.org/10.13128/a_h-7751)
- 441 Caldwell, J. P., & De Araújo, M. C. (1998). Cannibalistic interactions resulting from  
442 indiscriminate predatory behavior in tadpoles of poison frogs (Anura: Dendrobatidae).  
443 *Biotropica*. <https://doi.org/10.1111/j.1744-7429.1998.tb00372.x>
- 444 Campbell Grant, E. H. (2008). Visual Implant Elastomer Mark Retention Through  
445 Metamorphosis in Amphibian Larvae. *Journal of Wildlife Management*, 72(5), 1247–  
446 1252. <https://doi.org/10.2193/2007-183>
- 447 Courtois, E. A., Lelong, C., Calvez, O., Loyau, A., & Schmeller, D. S. (2013). The use of  
448 visible implant alpha tags for anuran tadpoles. *Herpetological Review*, 44(2), 230–233.
- 449 Courtois, E. A., Pineau, K., Villette, B., Schmeller, D. S., & Gaucher, P. (2012). Population  
450 estimates of *Dendrobates tinctorius* (anura: Dendrobatidae) at three sites in French  
451 Guiana and first record of chytrid infection. *Phyllomedusa*, 11(1), 63–70.
- 452 Coyle, S. D., Durborow, R. M., & Tidwell, J. H. (2004). Anesthetics in Aquaculture. *SRAC*  
453 *Publication*, 3900(3900). [http://fisheries.tamu.edu/files/2013/09/SRAC-Publication-No.-  
454 3900-Anesthetics-in-Aquaculture.pdf](http://fisheries.tamu.edu/files/2013/09/SRAC-Publication-No.-3900-Anesthetics-in-Aquaculture.pdf)
- 455 Croft, D. P., Albanese, B., Arrowsmith, B. J., Botham, M., Webster, M., & Krause, J. (2003).  
456 Sex-biased movement in the guppy (*Poecilia reticulata*). *Oecologia*, 137(1), 62–68.  
457 <https://doi.org/10.1007/s00442-003-1268-6>
- 458 Defan, R. H., Shultz, G. M., & Weller, D. W. (1990). A Technique for the Photographic  
459 Identification and Cataloging of Dorsal Fins of the Bottlenose Dolphin (*Tursiops*  
460 *truncatus*). *International Whaling Commission Special Issue Series*, 12(October).  
461 [https://www.researchgate.net/profile/Sally\\_Mizroch/publication/291157559\\_Report\\_of\\_  
462 the\\_workshop\\_on\\_individual\\_recognition\\_and\\_the\\_estimation\\_of\\_cetacean\\_population\\_  
463 \\_parameters/links/5807cdf008ae5ed04bfe7e78/Report-of-the-workshop-on-individual-](https://www.researchgate.net/profile/Sally_Mizroch/publication/291157559_Report_of_the_workshop_on_individual_recognition_and_the_estimation_of_cetacean_population_parameters/links/5807cdf008ae5ed04bfe7e78/Report-of-the-workshop-on-individual-)



- 464 recognition-
- 465 Diefenbach, D. R. ., & Alt, G. L. (1998). Modeling and Evaluation of Ear Tag Loss in Black  
466 Bears. *The Journal of Wildlife Management*, 62(4), 1292–1300.
- 467 Donnelly, M. A., Guyer, C., Juterbock, J. E., & Alford, R. A. (1994). Techniques for marking  
468 amphibians. *Measuring and Monitoring Biological Diversity. Standard Methods for*  
469 *Amphibians (Biological Diversity Handbook)*, 277–284.
- 470 Erich, M., Ringler, M., Hödl, W., & Ringler, E. (2013). Bet-hedging in Tadpole Deposition  
471 in the Neotropical Frog. *Universität Wien*.
- 472 Halekoh, U., & Højsgaard, S. (2014). A Kenward-Roger approximation and parametric  
473 bootstrap methods for tests in linear mixed models-the R package pbrtest. *Journal of*  
474 *Statistical Software*, 59(9), 1–32. <https://doi.org/10.18637/jss.v059.i09>
- 475 Holekamp, K. E., Smale, L., Berg, R., & Cooper, S. M. (1997). Hunting rates and hunting  
476 success in the spotted hyena (*Crocuta crocuta*). *Journal of Zoology*, 242(1), 1–15.  
477 <https://doi.org/10.1111/j.1469-7998.1997.tb02925.x>
- 478 Howard, R. D. (1978). The Evolution of Mating Strategies in Bullfrogs, *Rana catesbeiana*.  
479 *Evolution*, 32(4), 850. <https://doi.org/10.2307/2407499>
- 480 Jolly, G. M. (1965). Explicit Estimates from Capture-Recapture Data with Both Death and  
481 Immigration- Stochastic Model. *Biometrika*, 52(1), 225–247.
- 482 Lebreton, J.-D., Burnham, K. P., Clobert, J., & Anderson, D. R. (1992). Modeling Survival  
483 and Testing Biological Hypotheses Using Marked Animals : A Unified Approach with  
484 Case Studies. *Ecological Society of America*, 62(1), 67–118.
- 485 Martin, R. A. (2011). Evaluating a novel technique for individual identification of anuran  
486 tadpoles using coded wire tags. *Herpetological Conservation and Biology*, 5(2), 253–  
487 262. <https://doi.org/10.1227/01.NEU.0000125007.03145.00>
- 488 Matthews, C. J. D., Luque, S. P., Petersen, S. D., Andrews, R. D., & Ferguson, S. H. (2011).  
489 Satellite tracking of a killer whale (*Orcinus orca*) in the eastern Canadian Arctic  
490 documents ice avoidance and rapid, long-distance movement into the North Atlantic.  
491 *Polar Biology*, 34(7), 1091–1096. <https://doi.org/10.1007/s00300-010-0958-x>
- 492 McHarry, K. W., Abbott, J. M., van Hattem, M. G., & Hudgens, B. R. (2018). Efficacy of  
493 visible implant elastomer tags with photographic assist for identifying individuals in  
494 capture-mark-recapture studies using larval frogs. *Herpetological Conservation and*  
495 *Biology*, 13(3), 576–585.
- 496 McIntyre, P. B., Baldwin, S., & Flecker, A. S. (2004). Effects of behavioral and  
497 morphological plasticity on risk of predation in a Neotropical tadpole. *Oecologia*,

- 498 141(1), 130–138. <https://doi.org/10.1007/s00442-004-1652-x>
- 499 Ménard, N., Segesser, F. Von, Scheffrahn, W., & Pastorini, J. (2001). Is male – infant  
500 caretaking related to paternity and / or mating activities in wild Barbary macaques (  
501 *Macaca sylvanus*)? *Life Sciences*, 324, 601–610.
- 502 National Center for Biotechnology Information. (2020). 2-Phenoxyethanol. *PubChem*  
503 *Database*, 1–48.
- 504 Nauwelaerts, S., Coeck, J., & Aerts, P. (2000). Visible implant elastomers as a method for  
505 marking adult anurans. *Herpetological Review*, 31(3), 154–155.
- 506 Osbourn, M. S., Hocking, D. J., Conner, C. A., Peterman, W. E., & Semlitsch, R. D. (2011).  
507 Use of fluorescent visible implant alphanumeric tags to individually Mark Juvenile  
508 ambystomatid salamanders. *Herpetological Review*, 42(1), 43–47.
- 509 Pašukonis, A., Loretto, M.-C., & Rojas, B. (2019). How far do tadpoles travel in the  
510 rainforest? Parent-assisted dispersal in poison frogs. *Evolutionary Ecology*, 0123456789.  
511 <https://doi.org/10.1007/s10682-019-09994-z>
- 512 Perret, N., & Joly, P. (2002). Impacts of Tattooing and Pit-Tagging on Survival and  
513 Fecundity in the Alpine Newt (*Triturus Alpestris*). *Herpetologica*, 58(1), 131–138.  
514 [https://doi.org/10.1655/0018-0831\(2002\)058\[0131:iotapo\]2.0.co;2](https://doi.org/10.1655/0018-0831(2002)058[0131:iotapo]2.0.co;2)
- 515 Phillott, A. D., Skerratt, L. F., McDonald, K. R., Lemckert, F. L., Hines, H. B., Clarke, J. M.,  
516 Alford, R. A., & Speare, R. (2007). Toe-clipping as an acceptable method of identifying  
517 individual anurans in mark recapture studies. *Herpetological Review*, 38(3), 305–308.
- 518 Plummer, M. (2003). JAGS: A program for Analysis of Bayesian Graphical Models Using  
519 Gibbs Sampling. *Proceedings of DSC*. <https://doi.org/10.1002/ana.1067>
- 520 Pyke, G. H., & White, A. W. (2001). A review of the biology of the Green and Golden Bell  
521 Frog *Litoria aurea*. *Australian Zoologist*, 31(4), 563–598.  
522 <https://doi.org/10.7882/AZ.2001.003>
- 523 Reading, C. J., & Clarke, R. T. (1988). Multiple clutches, egg mortality and mate choice in  
524 the mid-wife toad, *Alytes obstetricans*. *Amphibia Reptilia*, 9(4), 357–364.  
525 <https://doi.org/10.1163/156853888X00035>
- 526 Ringler, E., Mangione, R., & Ringler, M. (2015). Where have all the tadpoles gone?  
527 Individual genetic tracking of amphibian larvae until adulthood. *Molecular Ecology*  
528 *Resources*, 15(4), 737–746. <https://doi.org/10.1111/1755-0998.12345>
- 529 Ringler, E., Pašukonis, A., Hödl, W., & Ringler, M. (2013). Tadpole transport logistics in a  
530 Neotropical poison frog: indications for strategic planning and adaptive plasticity in  
531 anuran parental care. *Frontiers in Zoology*, 10(1), 67.

- 532 9994-10-67
- 533 Rojas, B. (2014). Strange parental decisions: Fathers of the dyeing poison frog deposit their  
534 tadpoles in pools occupied by large cannibals. *Behavioral Ecology and Sociobiology*,  
535 68(4), 551–559. <https://doi.org/10.1007/s00265-013-1670-y>
- 536 Rojas, B. (2015). Mind the gap : treefalls as drivers of parental trade-offs. *Ecology and*  
537 *Evolution*. <https://doi.org/10.1002/ece3.1648>
- 538 Rojas, B., & Endler, J. A. (2013). Sexual dimorphism and intra-populational colour pattern  
539 variation in the aposematic frog *Dendrobates tinctorius*. *Evolutionary Ecology*, 27(4),  
540 739–753. <https://doi.org/10.1007/s10682-013-9640-4>
- 541 Rojas, B., & Pašukonis, A. (2019). From Habitat Use to Social Behavior : Natural History of  
542 a Voiceless Poison Frog, *Dendrobates tinctorius*. *PeerJ*. <https://doi.org/10.1101/515122>
- 543 Rudolf, V. H. W., & Rödel, M. O. (2007). Phenotypic plasticity and optimal timing of  
544 metamorphosis under uncertain time constraints. *Evolutionary Ecology*, 21(1), 121–142.  
545 <https://doi.org/10.1007/s10682-006-0017-9>
- 546 Schulte, L. M., & Mayer, M. (2017). Poison frog tadpoles seek parental transportation to  
547 escape their cannibalistic siblings. *Journal of Zoology*, 303(2), 83–89.  
548 <https://doi.org/10.1111/jzo.12472>
- 549 Seber, G. A. F. (1965). A Note on the Multiple-Recapture Census. *Biometrika*, 52(1), 249–  
550 259.
- 551 Su, U., & Yajima, M. (2015). R2jags: Using R to run “JAGS.” *R Packages*, 12.  
552 <https://doi.org/http://cran.r-project.org/package=R2jags>
- 553 Summers, K., & Tumulty, J. (2013). Parental Care, Sexual Selection, and Mating Systems in  
554 Neotropical Poison Frogs. In *Sexual Selection: Perspectives and Models from the*  
555 *Neotropics* (pp. 289–320). <https://doi.org/10.1016/B978-0-12-416028-6.00011-6>
- 556 Therneau, T. M. (2014). *Package ‘survival.’*
- 557 Touchon, J. C., & Warkentin, K. M. (2008). Fish and dragonfly nymph predators induce  
558 opposite shifts in color and morphology of tadpoles. *Oikos*, 0(0), 080227085440234–0.  
559 <https://doi.org/10.1111/j.2008.0030-1299.16354.x>
- 560 Wickham, H., Averick, M., Bryan, J., Chang, W., McGowan, L., François, R., Golemund,  
561 G., Hayes, A., Henry, L., Hester, J., Kuhn, M., Pedersen, T., Miller, E., Bache, S.,  
562 Müller, K., Ooms, J., Robinson, D., Seidel, D., Spinu, V., ... Yutani, H. (2019).  
563 Welcome to the Tidyverse. *Journal of Open Source Software*, 4(43), 1686.  
564 <https://doi.org/10.21105/joss.01686>
- 565 Acme-Hardstry. (2013). Phenoxyethanol ; 2-phenoxyethanol. *Federal Register*, 77(58), 1–6.

- 566 Akaike, H. (1973). Maximum likelihood identification of Gaussian autoregressive moving  
567 average models. *Biometrika*, 60(2), 255–265.
- 568 Andis, A. Z. (2018). A new, noninvasive method of batch-marking amphibians across  
569 developmental stages. *Herpetological Conservation and Biology*, May.
- 570 Anholt, B. R., Negovetic, S., & Som, C. (1998). Methods for anaesthetizing and marking  
571 larval anurans. *Herpetological Review*, 29(3), 153–154.
- 572 Bailey, L. L. (2004). Evaluating Elastomer Marking and Photo Identification Methods for  
573 Terrestrial Salamanders: Marking Effects and Observer Bias. *Herpetological Review*,  
574 35(1), 38–41.
- 575 Bainbridge, L., Stockwell, M., Valdez, J., Klop-Toker, K., Clulow, S., Clulow, J., & Mahony,  
576 M. (2015). Tagging tadpoles: Retention rates and impacts of visible implant elastomer  
577 (VIE) tags from the larval to adult amphibian stages. *Herpetological Journal*, 25(3),  
578 133–140.
- 579 Bates, D., Mächler, M., Bolker, B. M., & Walker, S. C. (2015). Fitting linear mixed-effects  
580 models using lme4. *Journal of Statistical Software*, 67(1).  
581 <https://doi.org/10.18637/jss.v067.i01>
- 582 Caballero-Gini, A., Villafaña, D. B., Romero, L., Ferreira, M., Cañete, L., Laino, R., &  
583 Musalem, K. (2019). Visible implant alphanumeric (VIA) as a marking method in the  
584 lesser snouted treefrog *scinax nasicus*. *Acta Herpetologica*, 14(2), 129–133.  
585 [https://doi.org/10.13128/a\\_h-7751](https://doi.org/10.13128/a_h-7751)
- 586 Caldwell, J. P., & De Araújo, M. C. (1998). Cannibalistic interactions resulting from  
587 indiscriminate predatory behavior in tadpoles of poison frogs (Anura: Dendrobatidae).  
588 *Biotropica*. <https://doi.org/10.1111/j.1744-7429.1998.tb00372.x>
- 589 Campbell Grant, E. H. (2008). Visual Implant Elastomer Mark Retention Through  
590 Metamorphosis in Amphibian Larvae. *Journal of Wildlife Management*, 72(5), 1247–  
591 1252. <https://doi.org/10.2193/2007-183>
- 592 Courtois, E. A., Lelong, C., Calvez, O., Loyau, A., & Schmeller, D. S. (2013). The use of  
593 visible implant alpha tags for anuran tadpoles. *Herpetological Review*, 44(2), 230–233.
- 594 Courtois, E. A., Pineau, K., Villette, B., Schmeller, D. S., & Gaucher, P. (2012). Population  
595 estimates of *Dendrobates tinctorius* (anura: Dendrobatidae) at three sites in French  
596 Guiana and first record of chytrid infection. *Phyllomedusa*, 11(1), 63–70.
- 597 Coyle, S. D., Durborow, R. M., & Tidwell, J. H. (2004). Anesthetics in Aquaculture. *SRAC*  
598 *Publication*, 3900(3900). [http://fisheries.tamu.edu/files/2013/09/SRAC-Publication-No.-](http://fisheries.tamu.edu/files/2013/09/SRAC-Publication-No.-3900-Anesthetics-in-Aquaculture.pdf)  
599 [3900-Anesthetics-in-Aquaculture.pdf](http://fisheries.tamu.edu/files/2013/09/SRAC-Publication-No.-3900-Anesthetics-in-Aquaculture.pdf)

- 600 Croft, D. P., Albanese, B., Arrowsmith, B. J., Botham, M., Webster, M., & Krause, J. (2003).  
601 Sex-biased movement in the guppy (*Poecilia reticulata*). *Oecologia*, 137(1), 62–68.  
602 <https://doi.org/10.1007/s00442-003-1268-6>
- 603 Defan, R. H., Shultz, G. M., & Weller, D. W. (1990). A Technique for the Photographic  
604 Identification and Cataloging of Dorsal Fins of the Bottlenose Dolphin (*Tursiops*  
605 *truncatus*). *International Whaling Commission Special Issue Series*, 12(October).  
606 [https://www.researchgate.net/profile/Sally\\_Mizroch/publication/291157559\\_Report\\_of\\_](https://www.researchgate.net/profile/Sally_Mizroch/publication/291157559_Report_of_the_workshop_on_individual_recognition_and_the_estimation_of_cetacean_population_parameters/links/5807cdf008ae5ed04bfe7e78/Report-of-the-workshop-on-individual-recognition-)  
607 [the\\_workshop\\_on\\_individual\\_recognition\\_and\\_the\\_estimation\\_of\\_cetacean\\_population](https://www.researchgate.net/profile/Sally_Mizroch/publication/291157559_Report_of_the_workshop_on_individual_recognition_and_the_estimation_of_cetacean_population_parameters/links/5807cdf008ae5ed04bfe7e78/Report-of-the-workshop-on-individual-recognition-)  
608 [\\_parameters/links/5807cdf008ae5ed04bfe7e78/Report-of-the-workshop-on-individual-](https://www.researchgate.net/profile/Sally_Mizroch/publication/291157559_Report_of_the_workshop_on_individual_recognition_and_the_estimation_of_cetacean_population_parameters/links/5807cdf008ae5ed04bfe7e78/Report-of-the-workshop-on-individual-recognition-)  
609 [recognition-](https://www.researchgate.net/profile/Sally_Mizroch/publication/291157559_Report_of_the_workshop_on_individual_recognition_and_the_estimation_of_cetacean_population_parameters/links/5807cdf008ae5ed04bfe7e78/Report-of-the-workshop-on-individual-recognition-)
- 610 Diefenbach, D. R. ., & Alt, G. L. (1998). Modeling and Evaluation of Ear Tag Loss in Black  
611 Bears. *The Journal of Wildlife Management*, 62(4), 1292–1300.
- 612 Donnelly, M. A., Guyer, C., Juterbock, J. E., & Alford, R. A. (1994). Techniques for marking  
613 amphibians. *Measuring and Monitoring Biological Diversity. Standard Methods for*  
614 *Amphibians (Biological Diversity Handbook)*, 277–284.
- 615 Erich, M., Ringler, M., Hödl, W., & Ringler, E. (2013). Bet-hedging in Tadpole Deposition  
616 in the Neotropical Frog. *Universität Wien*.
- 617 Halekoh, U., & Højsgaard, S. (2014). A Kenward-Roger approximation and parametric  
618 bootstrap methods for tests in linear mixed models-the R package pbrktest. *Journal of*  
619 *Statistical Software*, 59(9), 1–32. <https://doi.org/10.18637/jss.v059.i09>
- 620 Holekamp, K. E., Smale, L., Berg, R., & Cooper, S. M. (1997). Hunting rates and hunting  
621 success in the spotted hyena (*Crocuta crocuta*). *Journal of Zoology*, 242(1), 1–15.  
622 <https://doi.org/10.1111/j.1469-7998.1997.tb02925.x>
- 623 Howard, R. D. (1978). The Evolution of Mating Strategies in Bullfrogs, *Rana catesbeiana*.  
624 *Evolution*, 32(4), 850. <https://doi.org/10.2307/2407499>
- 625 Jolly, G. M. (1965). Explicit Estimates from Capture-Recapture Data with Both Death and  
626 Immigration- Stochastic Model. *Biometrika*, 52(1), 225–247.
- 627 Lebreton, J.-D., Burnham, K. P., Clobert, J., & Anderson, D. R. (1992). Modeling Survival  
628 and Testing Biological Hypotheses Using Marked Animals : A Unified Approach with  
629 Case Studies. *Ecological Society of America*, 62(1), 67–118.
- 630 Martin, R. A. (2011). Evaluating a novel technique for individual identification of anuran  
631 tadpoles using coded wire tags. *Herpetological Conservation and Biology*, 5(2), 253–  
632 262. <https://doi.org/10.1227/01.NEU.0000125007.03145.00>
- 633 Matthews, C. J. D., Luque, S. P., Petersen, S. D., Andrews, R. D., & Ferguson, S. H. (2011).

- 634 Satellite tracking of a killer whale (*Orcinus orca*) in the eastern Canadian Arctic  
635 documents ice avoidance and rapid, long-distance movement into the North Atlantic.  
636 *Polar Biology*, 34(7), 1091–1096. <https://doi.org/10.1007/s00300-010-0958-x>
- 637 McHarry, K. W., Abbott, J. M., van Hattem, M. G., & Hudgens, B. R. (2018). Efficacy of  
638 visible implant elastomer tags with photographic assist for identifying individuals in  
639 capture-mark-recapture studies using larval frogs. *Herpetological Conservation and*  
640 *Biology*, 13(3), 576–585.
- 641 McIntyre, P. B., Baldwin, S., & Flecker, A. S. (2004). Effects of behavioral and  
642 morphological plasticity on risk of predation in a Neotropical tadpole. *Oecologia*,  
643 141(1), 130–138. <https://doi.org/10.1007/s00442-004-1652-x>
- 644 Ménard, N., Segesser, F. Von, Scheffrahn, W., & Pastorini, J. (2001). Is male – infant  
645 caretaking related to paternity and / or mating activities in wild Barbary macaques (*Macaca sylvanus*)? *Life Sciences*, 324, 601–610.
- 647 National Center for Biotechnology Information. (2020). 2-Phenoxyethanol. *PubChem*  
648 *Database*, 1–48.
- 649 Nauwelaerts, S., Coeck, J., & Aerts, P. (2000). Visible implant elastomers as a method for  
650 marking adult anurans. *Herpetological Review*, 31(3), 154–155.
- 651 Osbourn, M. S., Hocking, D. J., Conner, C. A., Peterman, W. E., & Semlitsch, R. D. (2011).  
652 Use of fluorescent visible implant alphanumeric tags to individually Mark Juvenile  
653 ambystomatid salamanders. *Herpetological Review*, 42(1), 43–47.
- 654 Pašukonis, A., Loretto, M.-C., & Rojas, B. (2019). How far do tadpoles travel in the  
655 rainforest? Parent-assisted dispersal in poison frogs. *Evolutionary Ecology*, 0123456789.  
656 <https://doi.org/10.1007/s10682-019-09994-z>
- 657 Perret, N., & Joly, P. (2002). Impacts of Tattooing and Pit-Tagging on Survival and  
658 Fecundity in the Alpine Newt (*Triturus Alpestris*). *Herpetologica*, 58(1), 131–138.  
659 [https://doi.org/10.1655/0018-0831\(2002\)058\[0131:iotapo\]2.0.co;2](https://doi.org/10.1655/0018-0831(2002)058[0131:iotapo]2.0.co;2)
- 660 Phillott, A. D., Skerratt, L. F., McDonald, K. R., Lemckert, F. L., Hines, H. B., Clarke, J. M.,  
661 Alford, R. A., & Speare, R. (2007). Toe-clipping as an acceptable method of identifying  
662 individual anurans in mark recapture studies. *Herpetological Review*, 38(3), 305–308.
- 663 Plummer, M. (2003). JAGS: A program for Analysis of Bayesian Graphical Models Using  
664 Gibbs Sampling. *Proceedings of DSC*. <https://doi.org/10.1002/ana.1067>
- 665 Pyke, G. H., & White, A. W. (2001). A review of the biology of the Green and Golden Bell  
666 Frog *Litoria aurea*. *Australian Zoologist*, 31(4), 563–598.  
667 <https://doi.org/10.7882/AZ.2001.003>

- 668 Reading, C. J., & Clarke, R. T. (1988). Multiple clutches, egg mortality and mate choice in  
669 the mid-wife toad, *Alytes obstetricans*. *Amphibia Reptilia*, 9(4), 357–364.  
670 <https://doi.org/10.1163/156853888X00035>
- 671 Ringler, E., Mangione, R., & Ringler, M. (2015). Where have all the tadpoles gone?  
672 Individual genetic tracking of amphibian larvae until adulthood. *Molecular Ecology*  
673 *Resources*, 15(4), 737–746. <https://doi.org/10.1111/1755-0998.12345>
- 674 Ringler, E., Pašukonis, A., Hödl, W., & Ringler, M. (2013). Tadpole transport logistics in a  
675 Neotropical poison frog: indications for strategic planning and adaptive plasticity in  
676 anuran parental care. *Frontiers in Zoology*, 10(1), 67. [https://doi.org/10.1186/1742-](https://doi.org/10.1186/1742-9994-10-67)  
677 [9994-10-67](https://doi.org/10.1186/1742-9994-10-67)
- 678 Rojas, B. (2014). Strange parental decisions: Fathers of the dyeing poison frog deposit their  
679 tadpoles in pools occupied by large cannibals. *Behavioral Ecology and Sociobiology*,  
680 68(4), 551–559. <https://doi.org/10.1007/s00265-013-1670-y>
- 681 Rojas, B. (2015). Mind the gap : treefalls as drivers of parental trade-offs. *Ecology and*  
682 *Evolution*. <https://doi.org/10.1002/ece3.1648>
- 683 Rojas, B., & Endler, J. A. (2013). Sexual dimorphism and intra-populational colour pattern  
684 variation in the aposematic frog *Dendrobates tinctorius*. *Evolutionary Ecology*, 27(4),  
685 739–753. <https://doi.org/10.1007/s10682-013-9640-4>
- 686 Rojas, B., & Pašukonis, A. (2019). From Habitat Use to Social Behavior : Natural History of  
687 a Voiceless Poison Frog, *Dendrobates tinctorius*. *PeerJ*. <https://doi.org/10.1101/515122>
- 688 Rudolf, V. H. W., & Rödel, M. O. (2007). Phenotypic plasticity and optimal timing of  
689 metamorphosis under uncertain time constraints. *Evolutionary Ecology*, 21(1), 121–142.  
690 <https://doi.org/10.1007/s10682-006-0017-9>
- 691 Schulte, L. M., & Mayer, M. (2017). Poison frog tadpoles seek parental transportation to  
692 escape their cannibalistic siblings. *Journal of Zoology*, 303(2), 83–89.  
693 <https://doi.org/10.1111/jzo.12472>
- 694 Seber, G. A. F. (1965). A Note on the Multiple-Recapture Census. *Biometrika*, 52(1), 249–  
695 259.
- 696 Su, U., & Yajima, M. (2015). R2jags: Using R to run “JAGS.” *R Packages*, 12.  
697 <https://doi.org/http://cran.r-project.org/package=R2jags>
- 698 Summers, K., & Tumulty, J. (2013). Parental Care, Sexual Selection, and Mating Systems in  
699 Neotropical Poison Frogs. In *Sexual Selection: Perspectives and Models from the*  
700 *Neotropics* (pp. 289–320). <https://doi.org/10.1016/B978-0-12-416028-6.00011-6>
- 701 Therneau, T. M. (2014). *Package ‘survival’.*

702 Touchon, J. C., & Warkentin, K. M. (2008). Fish and dragonfly nymph predators induce  
703 opposite shifts in color and morphology of tadpoles. *Oikos*, 0(0), 080227085440234–0.  
704 <https://doi.org/10.1111/j.2008.0030-1299.16354.x>

705 Wickham, H., Averick, M., Bryan, J., Chang, W., McGowan, L., François, R., Golemund,  
706 G., Hayes, A., Henry, L., Hester, J., Kuhn, M., Pedersen, T., Miller, E., Bache, S.,  
707 Müller, K., Ooms, J., Robinson, D., Seidel, D., Spinu, V., ... Yutani, H. (2019).  
708 Welcome to the Tidyverse. *Journal of Open Source Software*, 4(43), 1686.  
709 <https://doi.org/10.21105/joss.01686>

710

711
